# Supplementary material for: ACE2 Protein Landscape in the Head and Neck Region: The Conundrum of SARS-CoV-2 Infection
Source: MDPI journal article supplement (doi:10.3390/biology9080235), 2020-08-18
Supplement: s1 [file s1]

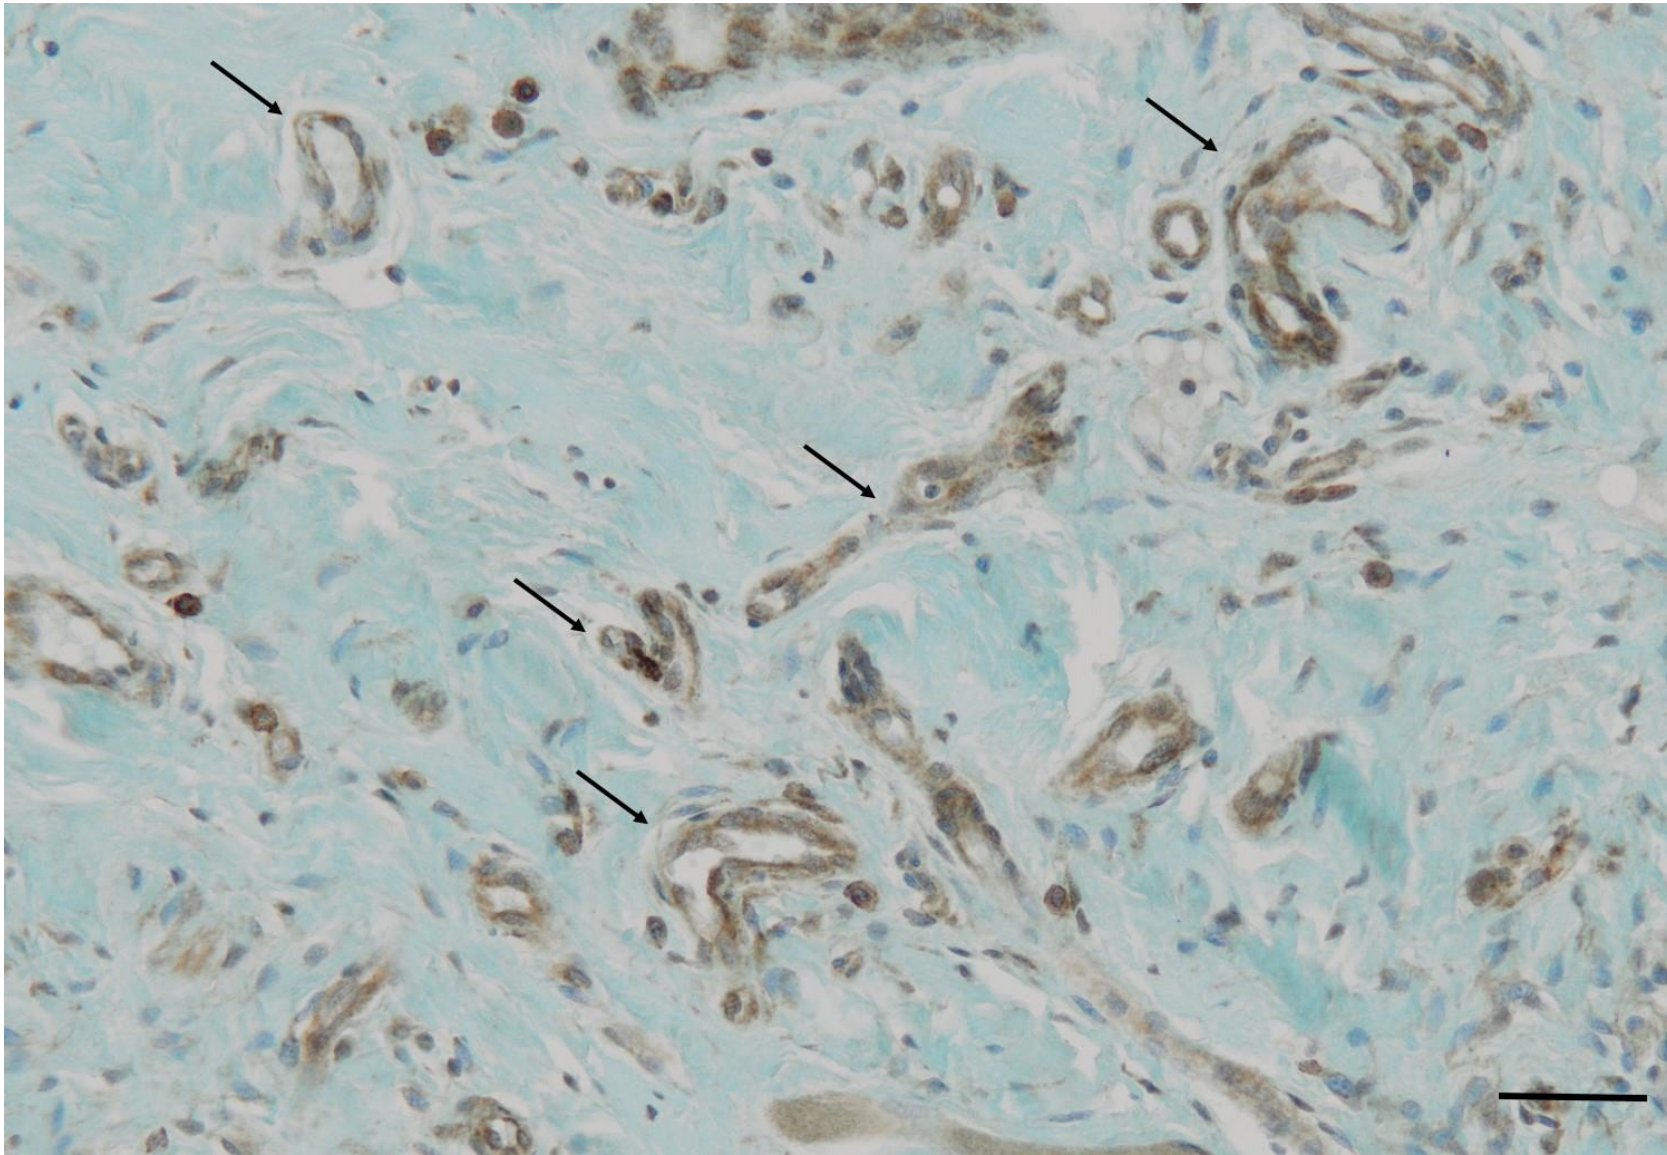

**Supplementary Figure 3:** Immunohistochemical labeling of ACE2 in endothelial cells (arrows) of sinuses with the polyclonal antibody. Scale bar = 100  $\mu$ m
