# Supplementary material for: ACE2 Protein Landscape in the Head and Neck Region: The Conundrum of SARS-CoV-2 Infection
Source: MDPI journal article supplement (doi:10.3390/biology9080235), 2020-08-18
Supplement: s1 [file s1]

**A**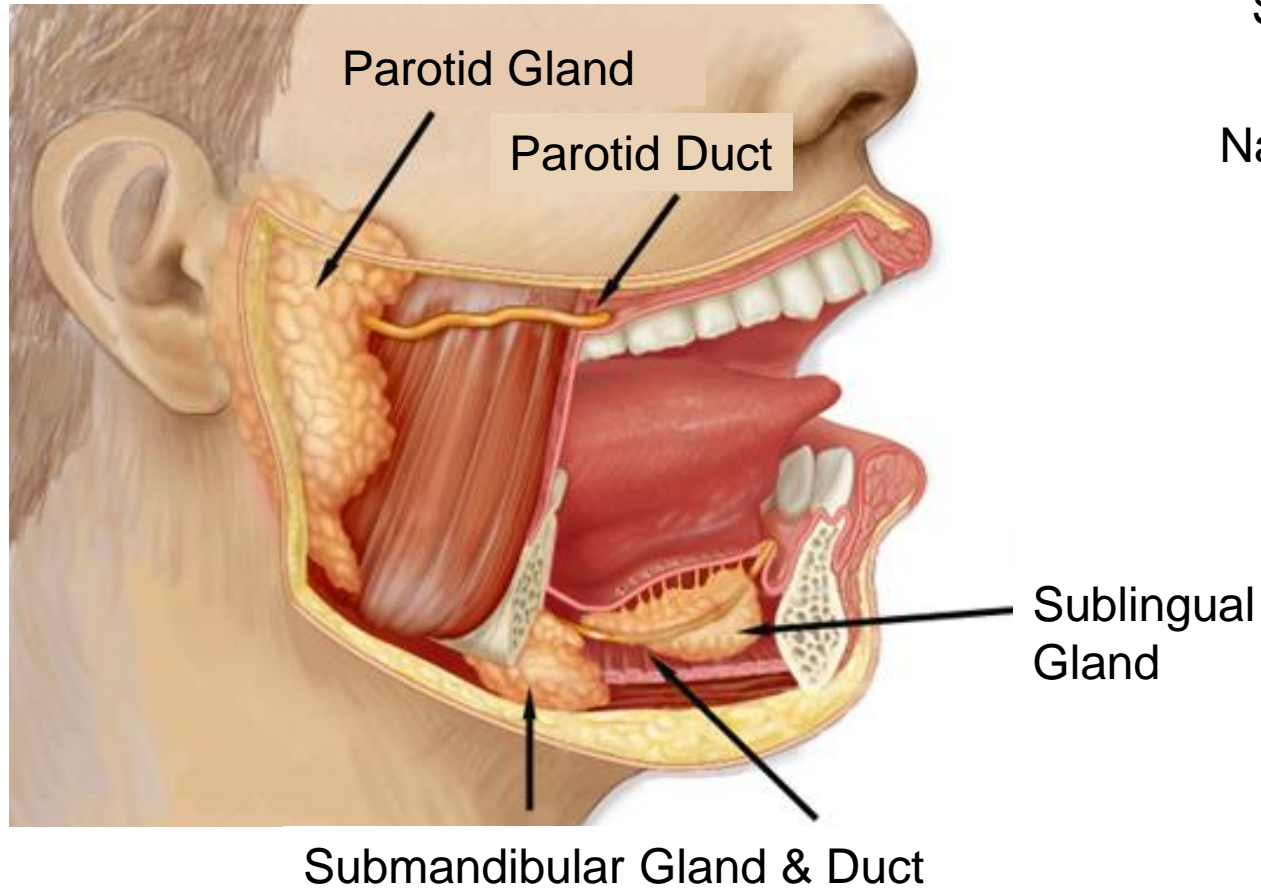**B**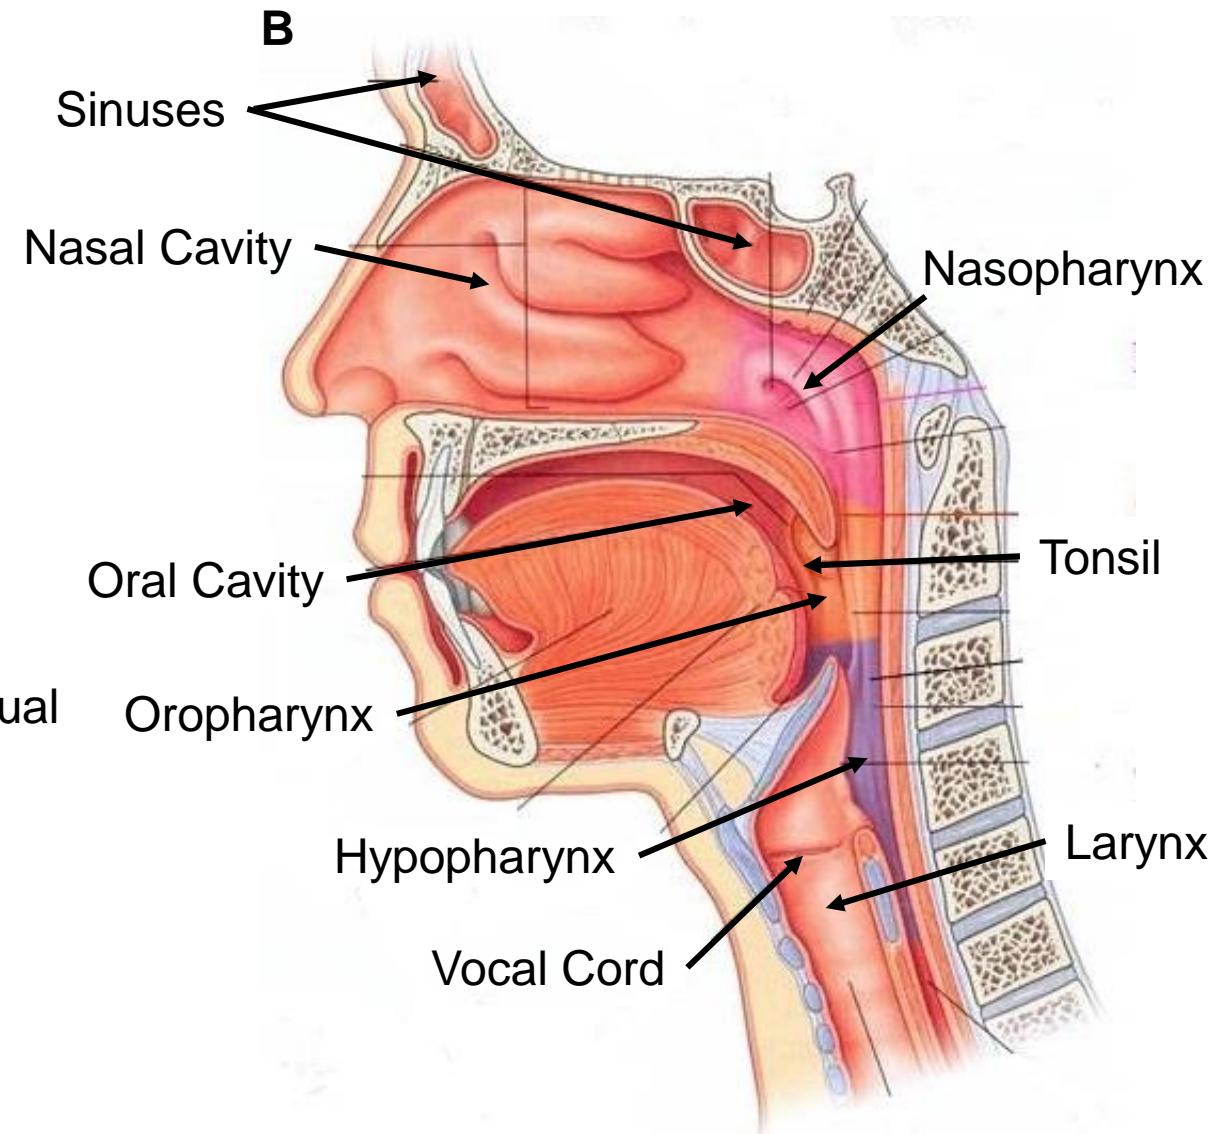

**Supplementary Figure 1:** Anatomical description and location of salivary glands (A) and head and neck structures (B). Schemes were obtained from <https://www.parotidsurgerymd.com/> (A) and from Gray's Anatomy 2<sup>nd</sup> Edition, Elsevier 2010 (B)
