# Supplementary material for: ACE2 Protein Landscape in the Head and Neck Region: The Conundrum of SARS-CoV-2 Infection
Source: MDPI journal article supplement (doi:10.3390/biology9080235), 2020-08-18
Supplement: s1 [file s1]

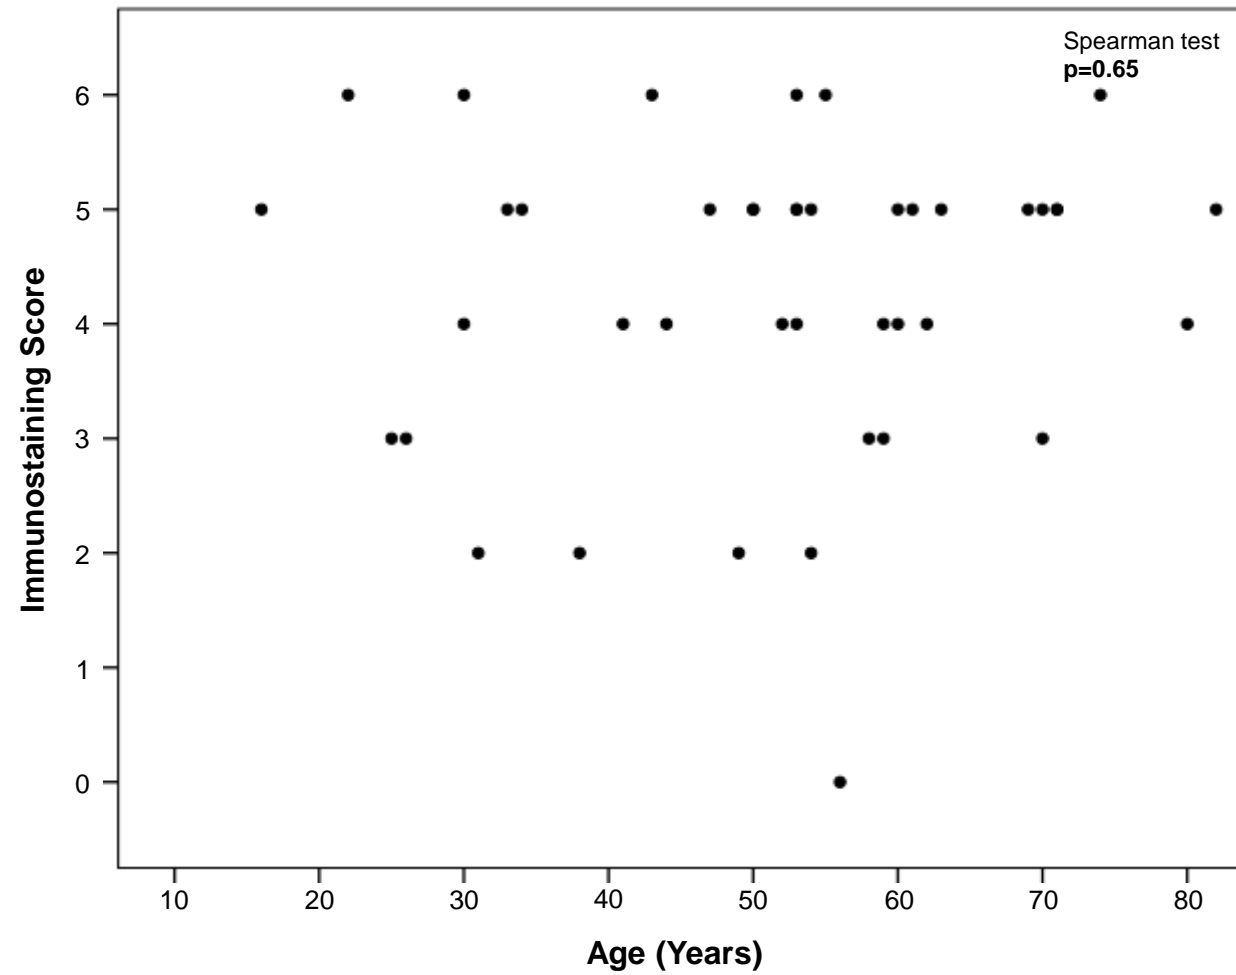

**Supplementary Figure 2.** Correlation between immunostaining scores of epithelial cells and patient age at the time of collection. Spearman correlation test between epithelial immunostaining scores and age of 42 patients ( $p=0.65$ , Spearman's rho test).
